# Supplementary material for: Analysis of behavioral flow resolves latent phenotypes
Source: Research Square preprint supplement (doi:10.21203/rs.3.rs-3268663/v1), 2023-09-18
Supplement: Supplementary file [file 6e2c4b4780b0cc02c68bde92.pdf]

# Supplementary Figures

## Analysis of behavioral flow resolves latent phenotypes

Lukas M. von Ziegler<sup>1,2,#</sup>, Fabienne K. Roessler<sup>1,2,#</sup>, Oliver Sturman<sup>1,2</sup>, Rebecca Waag<sup>1,2</sup>, Mattia Privitera<sup>1,2</sup>, Sian N Duss<sup>1,2</sup>, Eoin C. O'Connor<sup>3</sup> & Johannes Bohacek<sup>1,2,\*</sup>

<sup>1</sup> Laboratory of Molecular and Behavioral Neuroscience, Institute for Neuroscience, Department of Health Sciences and Technology, ETH Zurich, Switzerland

<sup>2</sup> Neuroscience Center Zurich, ETH Zurich and University of Zurich, Switzerland

<sup>3</sup> Roche Pharma Research and Early Development, Neuroscience & Rare Diseases, Roche Innovation Center Basel, Basel, Switzerland

# equal contribution

\* **Corresponding Author:** Johannes Bohacek, [johannes.bohacek@hest.ethz.ch](mailto:johannes.bohacek@hest.ethz.ch)

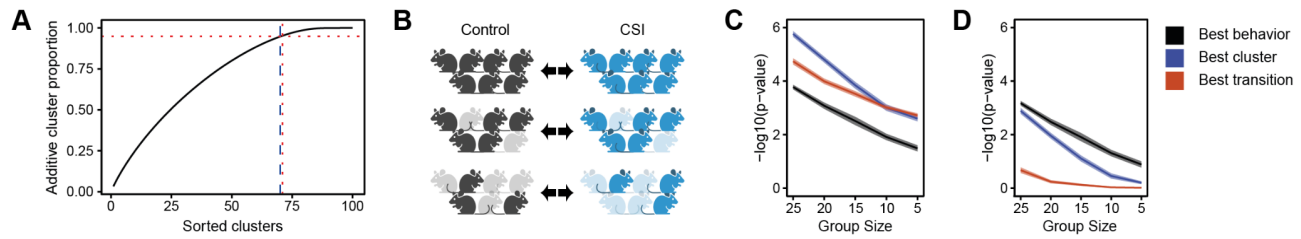

**Supplementary Figure 1.** (A) Determining the optimal number of clusters for k-means. Vertical red-dashed line marks the number of clusters (=71) which represent 95% of all frames (horizontal red-dashed line), and the blue dashed line marks the number of clusters (=70) we used for the CSI analysis. (B) Schematic of *in silico* approach to generate random subsets of each group of mice to run multiple two-group comparisons while gradually reducing group sizes. (C) Phenotype detection sensitivity in CSI with unadjusted p-values. (D) Sensitivity in CSI with adjusted p-values appropriately applying multiple testing correction.

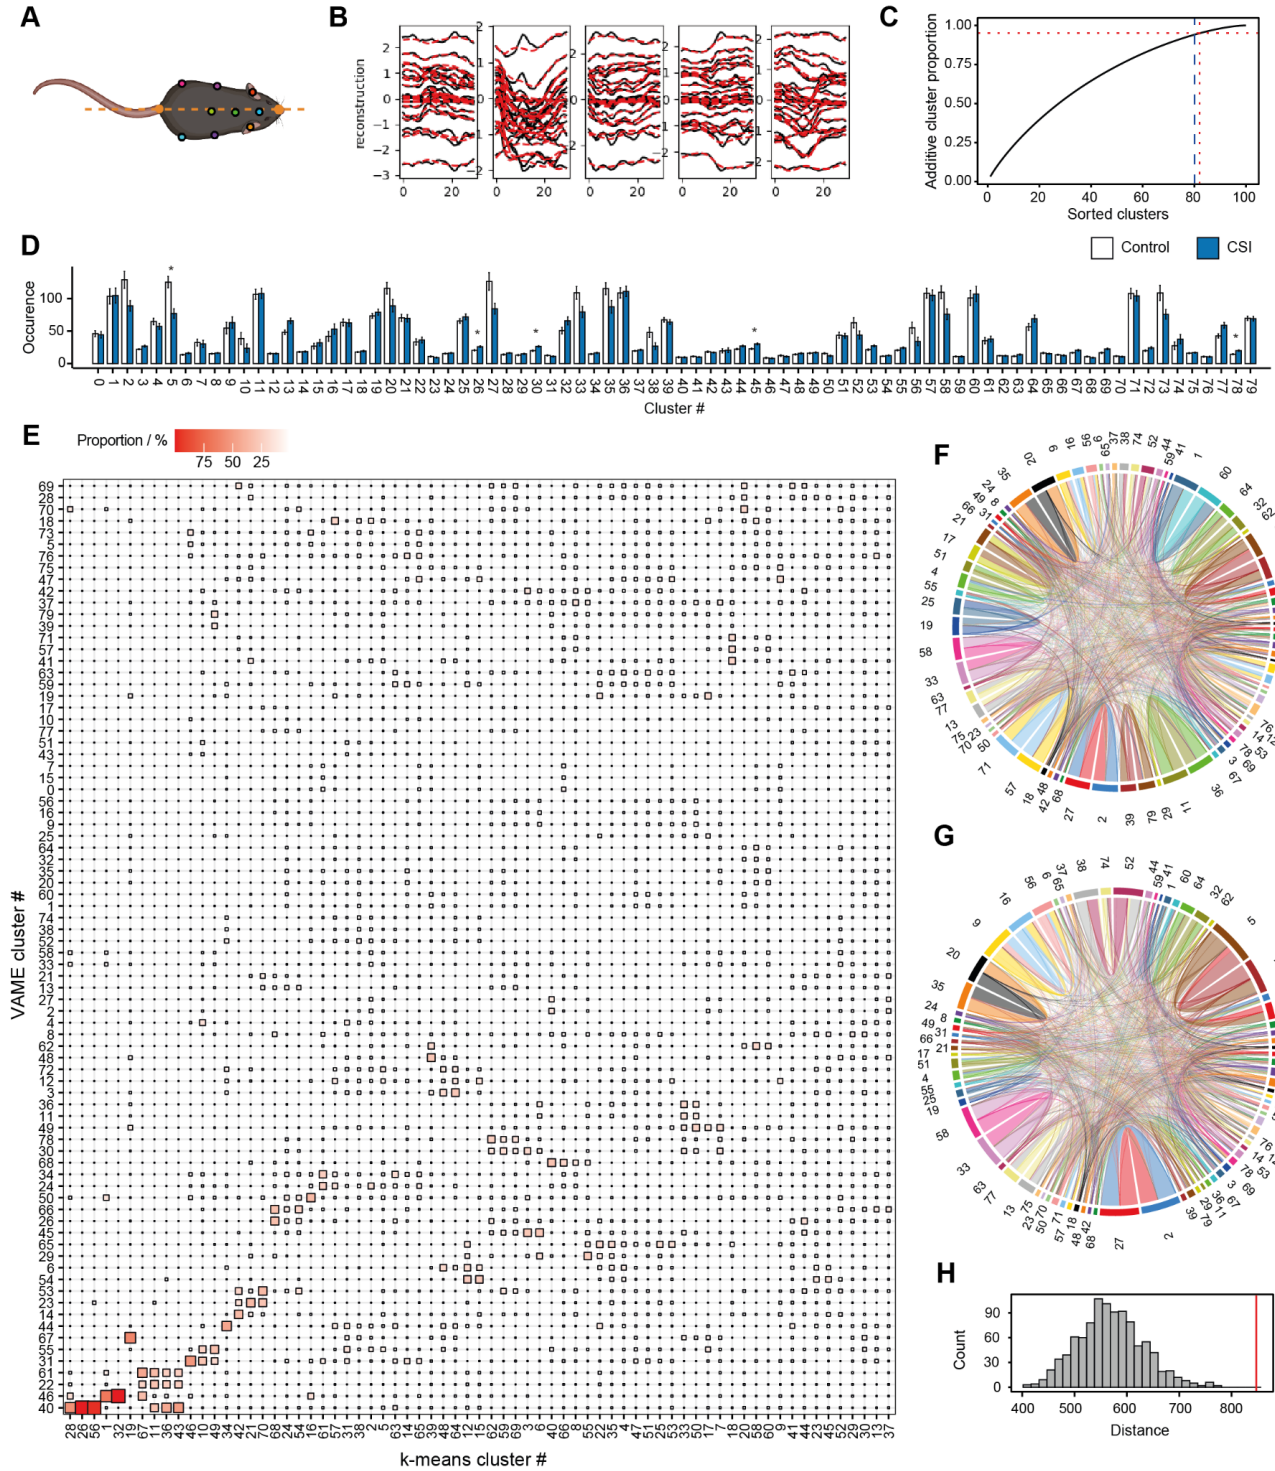

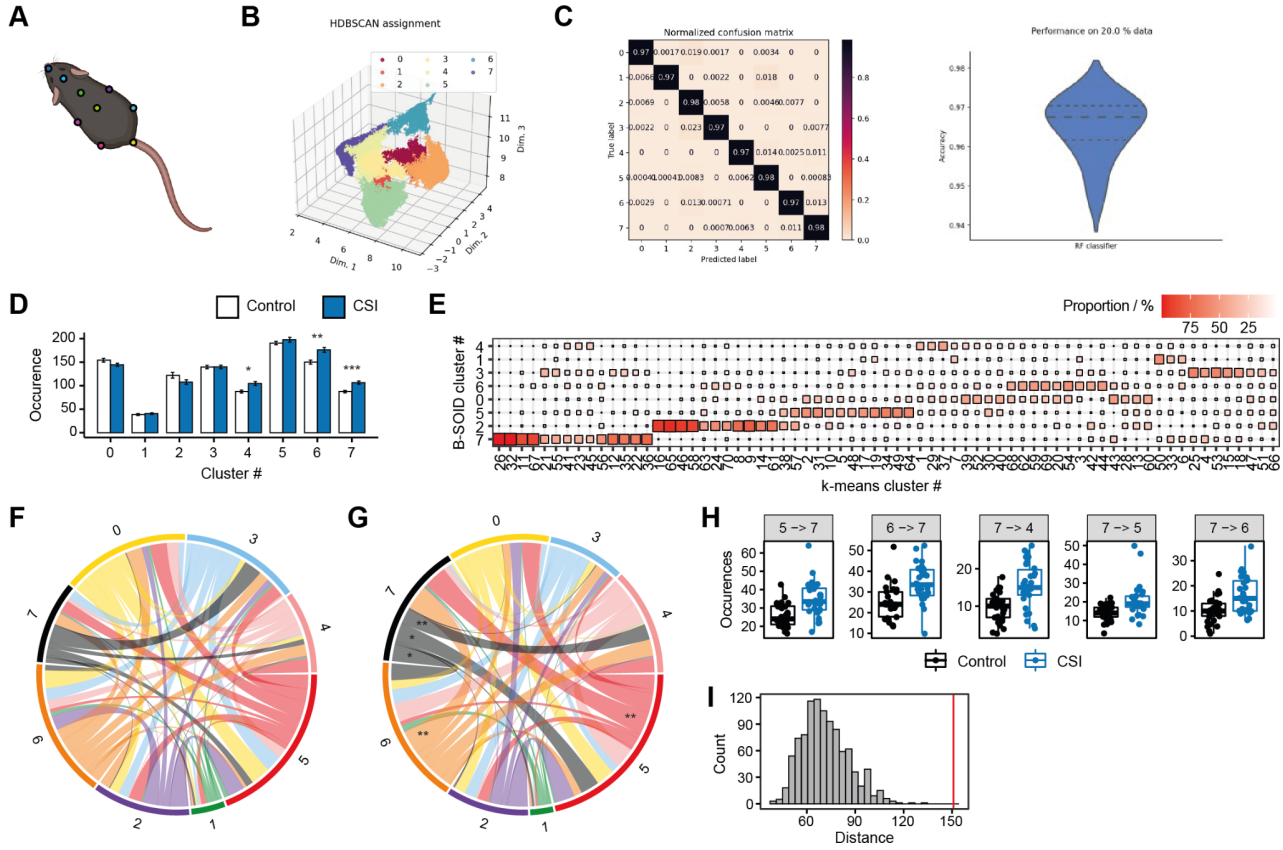

**Supplementary Figure 3.** (A) Tracking points used for B-SOiD. (B) UMAP visualization of cluster assignment in B-SOiD. (C) Performance of random forest classifier on training (left) and test (right) data. (D) B-SOiD cluster occurrences in CSI. (E) Mapping k-means clusters to B-SOiD clusters. (F) Average behavioral flow over all animals. (G) Absolute difference in behavioral flow in CSI vs. control. For each cluster, the absolute difference in the observed number of transitions between groups is plotted. (H) Transitions that are significantly different (adj.  $p < 0.05$ ) between CSI and controls. (I) BFA result for CSI using transitions between B-SOiD clusters (percentile=99.9,  $z=5.52$ ,  $p < 0.001$ ). Adj.  $p$ -values are denoted as: \* $< 0.05$ , \*\* $< 0.01$ , \*\*\* $< 0.001$ . Error bars denote  $\pm$  SEM.

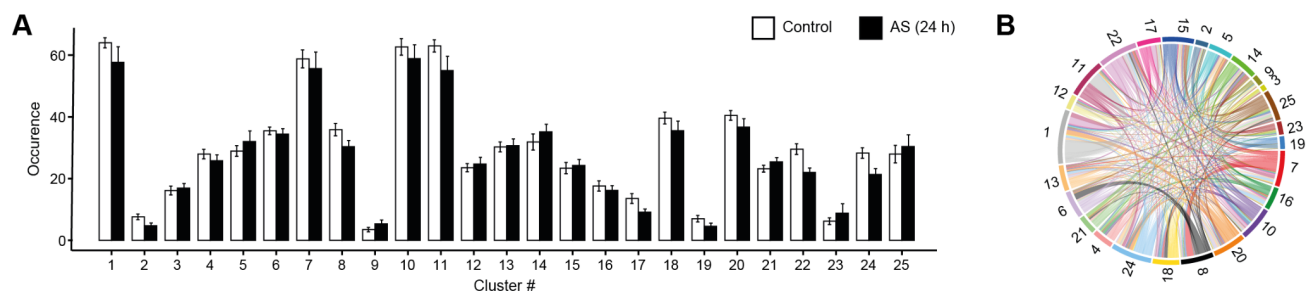

**Supplementary Figure 4.** (A) Cluster occurrences in AS (24 h). (B) Absolute difference of behavioral flow in control vs. AS (24 h). Error bars denote  $\pm$  SEM.

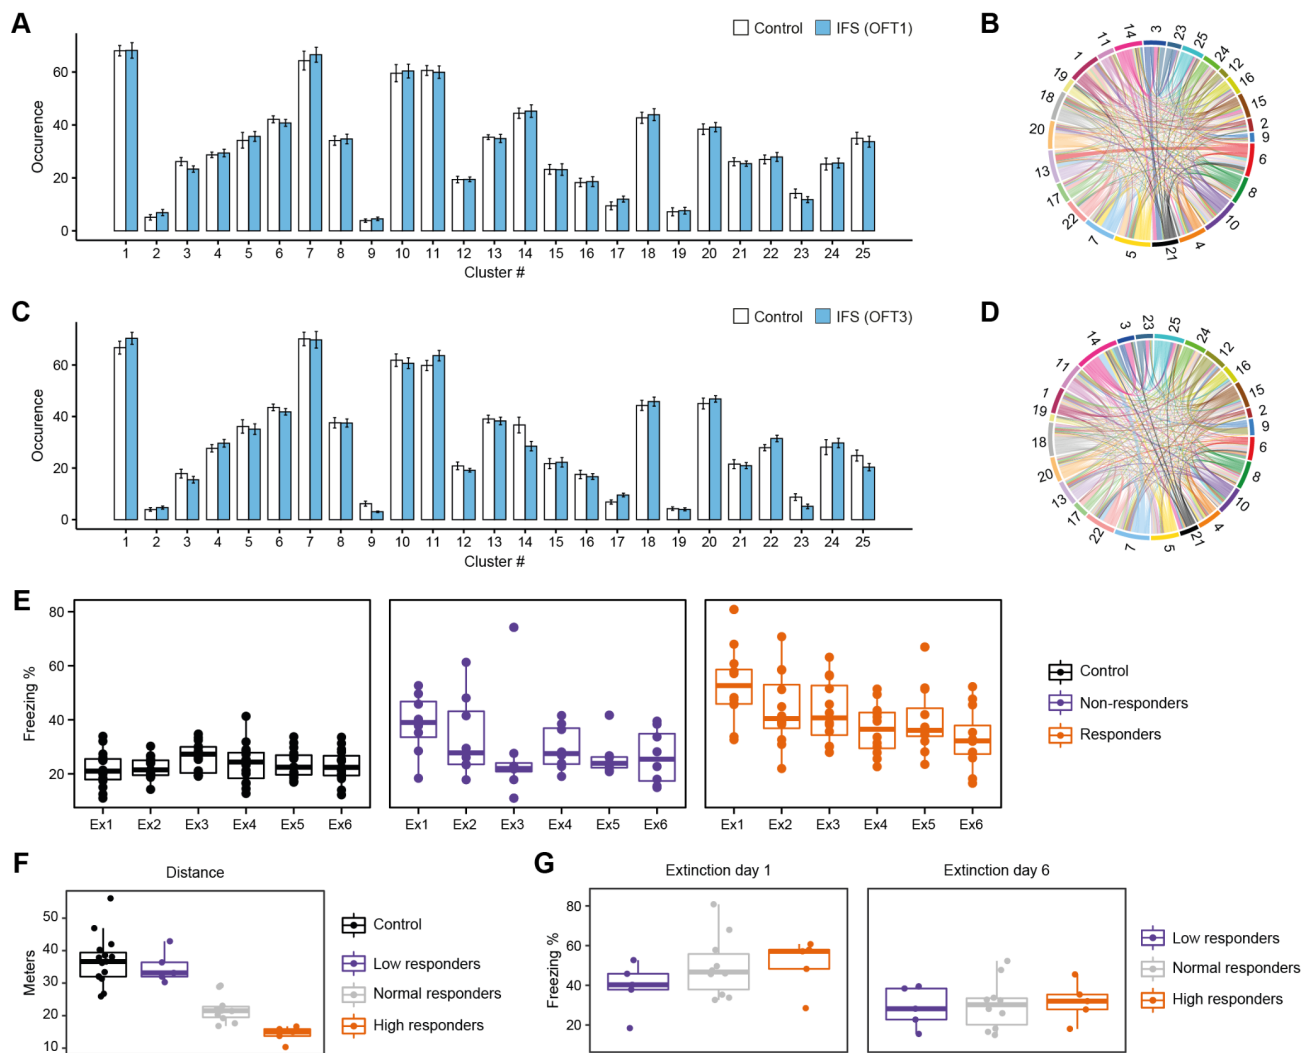

**Supplementary Figure 5.** (A) Cluster occurrences in IFS (OFT1). (B) Absolute difference in behavioral flow in control vs. IFS (OFT1). (C) Cluster occurrences in IFS (OFT3). (D) Absolute difference in behavioral flow in control vs. IFS (OFT3). (E) Freezing response across the extinction period for control, non-responder and responder mice. (F) Grouping of IFS mice into low, normal and high responders based on distance. (G) Freezing response on extinction days 1 and 6 reveals no differences between low, normal and high responding mice (extinction day 1:  $F(2,17)=1.10$ ,  $p=0.355$ ; extinction day 6:  $F(2,17)=0.08$ ,  $p=0.924$ ). Error bars denote  $\pm$  SEM.

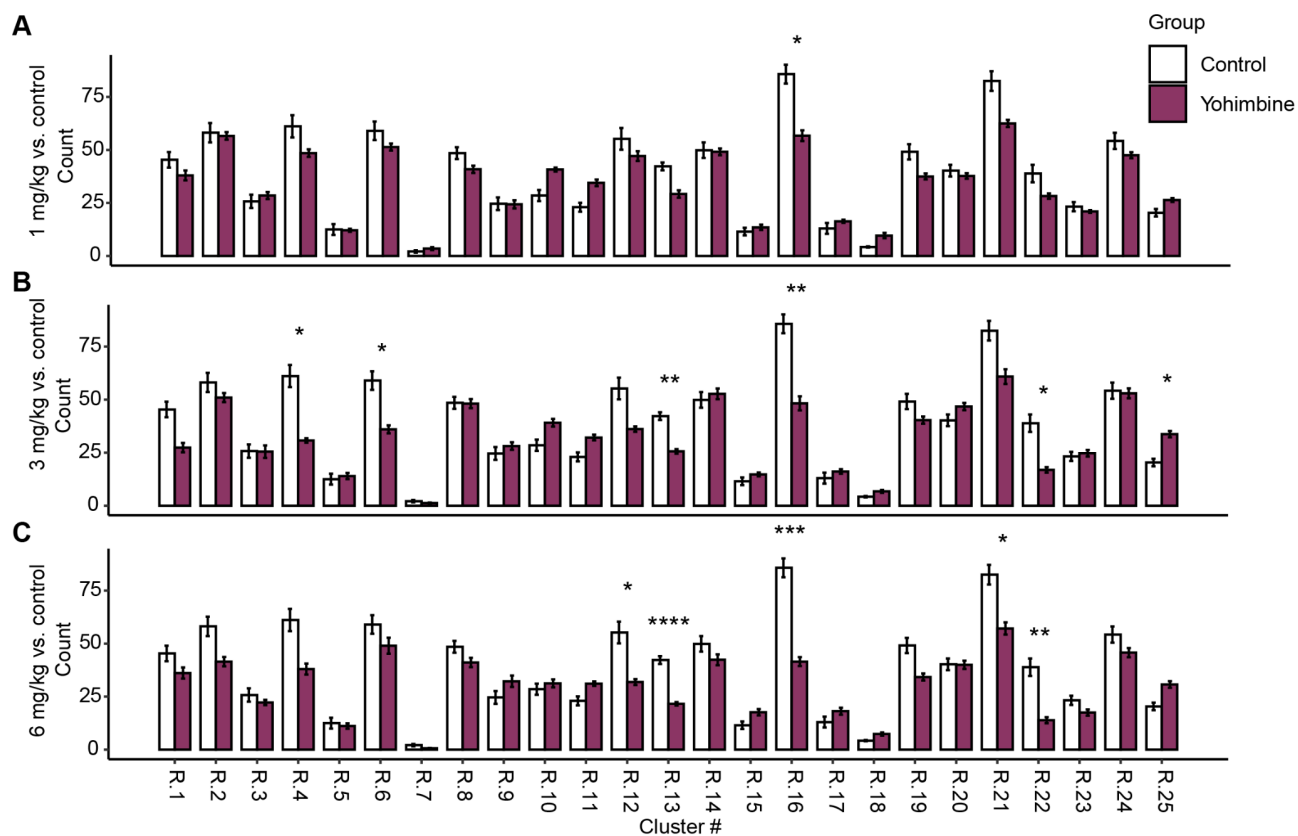

**Supplementary Figure 6.** (A) Cluster occurrences in 1mg/kg yohimbine vs. control (B) Cluster occurrences in 3mg/kg yohimbine vs. control (C) Cluster occurrences in 6mg/kg yohimbine vs. control. Adj. p-values are denoted as: \* $<0.05$ , \*\* $<0.01$ , \*\*\* $<0.001$ , \*\*\*\* $<0.0001$ . Error bars denote  $\pm$  SEM.
